# Supplementary material for: Anatomical Vascular Differences and Leishmania-Induced Vascular Morphological Changes Are Associated with a High Parasite Load in the Skin of Dogs Infected with Leishmania infantum
Source: MDPI journal article supplement (doi:10.3390/pathogens13050371), 2024-04-30
Supplement: s1 [file s1]

## Supplementary Materials

**Supplementary Table S1. Frequency of clinical signs evaluated in 13 clinically affected dogs and their respective clinical scores.**

| Number | General clinical signs                                                           | Dermatological Clinical Signs                                 | Clinical score |
|--------|----------------------------------------------------------------------------------|---------------------------------------------------------------|----------------|
| 105/09 | Lymphadenomegaly (1) loss of body condition (3)                                  | Alopecia (2) Onychogryphosis (3)                              | 9              |
| 113/09 | loss of body condition (2)<br>Lymphadenomegaly (2)                               | Alopecia (2) dermatitis (1)<br>Onychogryphosis (1)            | 8              |
| 124/09 | Ophthalmic alterations (3)                                                       | Alopecia (3) dermatitis (3)<br>Onychogryphosis (3)            | 12             |
| 127/09 | loss of body condition (2)                                                       | Alopecia (2) Onychogryphosis (3)<br>dermatitis (3)            | 10             |
| 241/10 | Lymphadenomegaly (1) loss of body condition (2)<br>Ophthalmic alterations (3)    | Dermatitis (1) Onychogryphosis (3)                            | 10             |
| 243/10 | loss of body condition (3)                                                       | Alopecia (1) dermatitis (1)<br>Onychogryphosis (3)            | 8              |
| 253/10 | loss of body condition (1)<br>Lymphadenomegaly (1)<br>Ophthalmic alterations (3) | Alopecia (1)<br>dermatitis (3)<br>Onychogryphosis (2)         | 11             |
| 254/10 | Ophthalmic alterations (1)<br>loss of body condition (2)                         | Dermatitis (2) Onychogryphosis (3) and<br>ulcers              | 8              |
| 255/10 | Ophthalmic alterations (1)<br>Lymphadenomegaly (1)<br>loss of body condition (2) | Alopecia (2) dermatitis (3)<br>Onychogryphosis (1) and ulcers | 10             |
| 259/10 | loss of body condition (2)<br>Lymphadenomegaly (2)<br>Ophthalmic alterations (3) | Alopecia (2) dermatitis (2)<br>Onychogryphosis (3)            | 14             |
| 261/10 | Ophthalmic alterations (1)<br>Lymphadenomegaly (3)                               | Alopecia (2) dermatitis (3)<br>Onychogryphosis (2)            | 11             |
| 262/10 | Ophthalmic alterations (1)<br>Lymphadenomegaly (2)<br>loss of body condition (3) | Alopecia (1)<br>dermatitis (2)<br>Onychogryphosis (3)         | 12             |
| 265/10 | Lymphadenomegaly (2)<br>Ophthalmic alterations (3)                               | Dermatitis (1)<br>Onychogryphosis (3)                         | 9              |

\* Subclinical animals were not included in this table since they had no visible clinical signs (clinical score = 0).

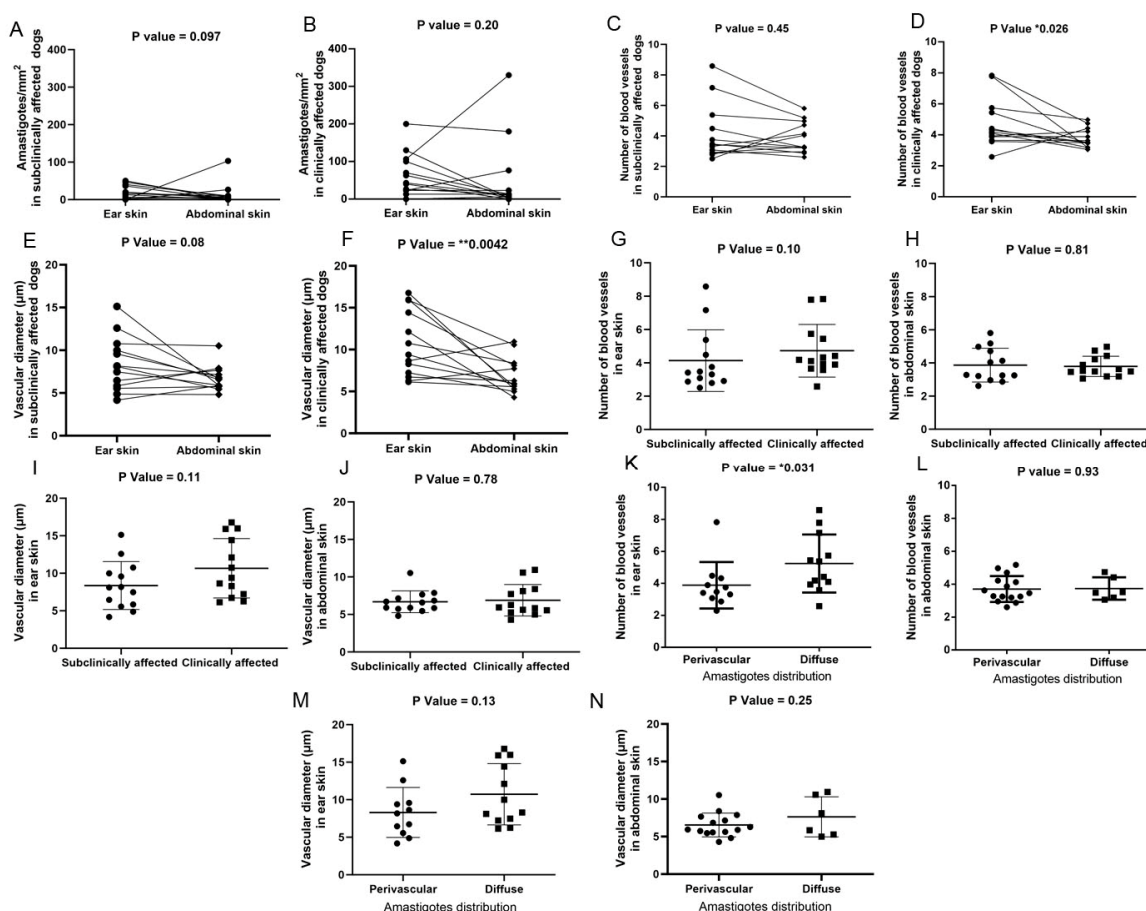

**Supplementary Figure S1.** Comparative analysis between amastigotes/mm<sup>2</sup>, amastigote distribution, vascular diameter and number of blood vessels in the ear and abdominal skin of dogs naturally infected with *L. infantum*. A: Amastigotes/mm<sup>2</sup> in paired samples of ear and abdominal skin of subclinically affected dogs (Wilcoxon test, P = 0.097). B: Amastigotes/mm<sup>2</sup> in paired samples of ear skin and abdominal skin of clinically affected dogs (Wilcoxon test, P = 0.20). C: Number of blood vessels in paired samples of ear skin and abdominal skin of subclinically affected dogs (Wilcoxon test, P = 0.45). D: Number of blood vessels in paired samples of ear skin and abdominal skin of clinically affected dogs (Wilcoxon test, P = \* 0.026). E: Vascular diameter in paired samples of ear skin and abdominal skin of subclinically affected dogs (paired t test, P = 0.08). F: Vascular diameter in paired samples of ear skin and abdominal skin of clinically affected dogs (paired t test, P = \*\* 0.008). G: Number of blood vessels in ear skin (Mann–Whitney test, P = 0.10). H: Number of blood vessels in the abdominal skin (unpaired t test, P = 0.81). I: Vascular diameter in ear skin (paired t test, P = 0.11). J: Vascular diameter in abdominal skin (unpaired t test, P = 0.78). K: Association between the number of blood vessels and amastigote distribution in ear skin (Mann–Whitney test, P = \* 0.031). L: Association between the number of blood vessels and amastigote distribution in abdominal skin (unpaired t test, P = 0.93). M: Association between vascular diameter and amastigote distribution in ear skin (unpaired t test, P = 0.13). N: Association between vascular diameter and amastigote distribution in abdominal skin (unpaired t test, P = 0.25).

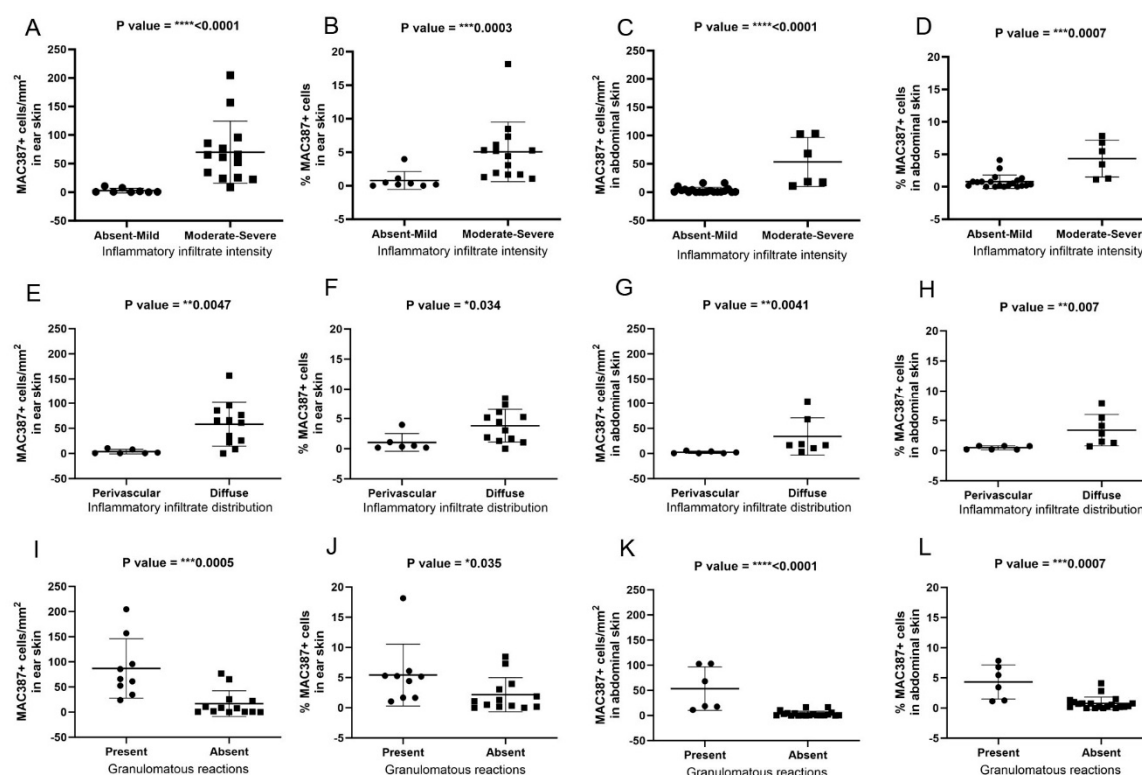

**Supplementary Figure S2.** Association between MAC 387 cells and the intensity and distribution of inflammatory infiltrate and the presence of granulomatous regions in ear skin and abdominal skin of dogs naturally infected with *L. infantum*. A: MAC387 cells/mm<sup>2</sup> according to the intensity of the inflammatory infiltrate in ear skin (Mann–Whitney test. P = \*\*\*\* < 0.0001). B: Percentage of MAC 387 cells according to the intensity of the inflammatory infiltrate in ear skin (Mann–Whitney test. P = \*\*\* 0.0003). C: MAC387 cells/mm<sup>2</sup> according to the intensity of the inflammatory infiltrate in abdominal skin (Mann–Whitney test. P = \*\*\*\* < 0.0001). D: Percentage of MAC 387 cells according to the intensity of the inflammatory infiltrate in abdominal skin (Mann–Whitney test. P = \*\*\* 0.0007). E: MAC387 cells/mm<sup>2</sup> according to the distribution of inflammatory infiltrate in ear skin (Mann–Whitney test. P = \*\* 0.0047). F: Percentage of MAC 387 cells according to the distribution of inflammatory infiltrate in ear skin (unpaired t test. P = \* 0.034). G: MAC387 cells/mm<sup>2</sup> according to the distribution of inflammatory infiltrate in abdominal skin (Mann–Whitney test. P = \*\* 0.0041). H: Percentage of MAC 387 cells according to the distribution of inflammatory infiltrate in abdominal skin (Mann–Whitney test. P = \*\* 0.007). I: MAC 387 cells/mm<sup>2</sup> according to the presence of granulomatous regions in ear skin (Mann–Whitney test. P = \*\*\* 0.0005). J: Percentage of MAC 387 cells according to the presence of granulomatous regions in ear skin (Mann–Whitney test. P = \* 0.035). K: MAC387 cells/mm<sup>2</sup> according to the presence of granulomatous regions in abdominal skin (Mann–Whitney test. P = \*\*\*\* < 0.0001). L: Percentage of MAC 387 cells according to the presence of granulomatous regions in abdominal skin (Mann–Whitney test. P = \*\*\* 0.0007).

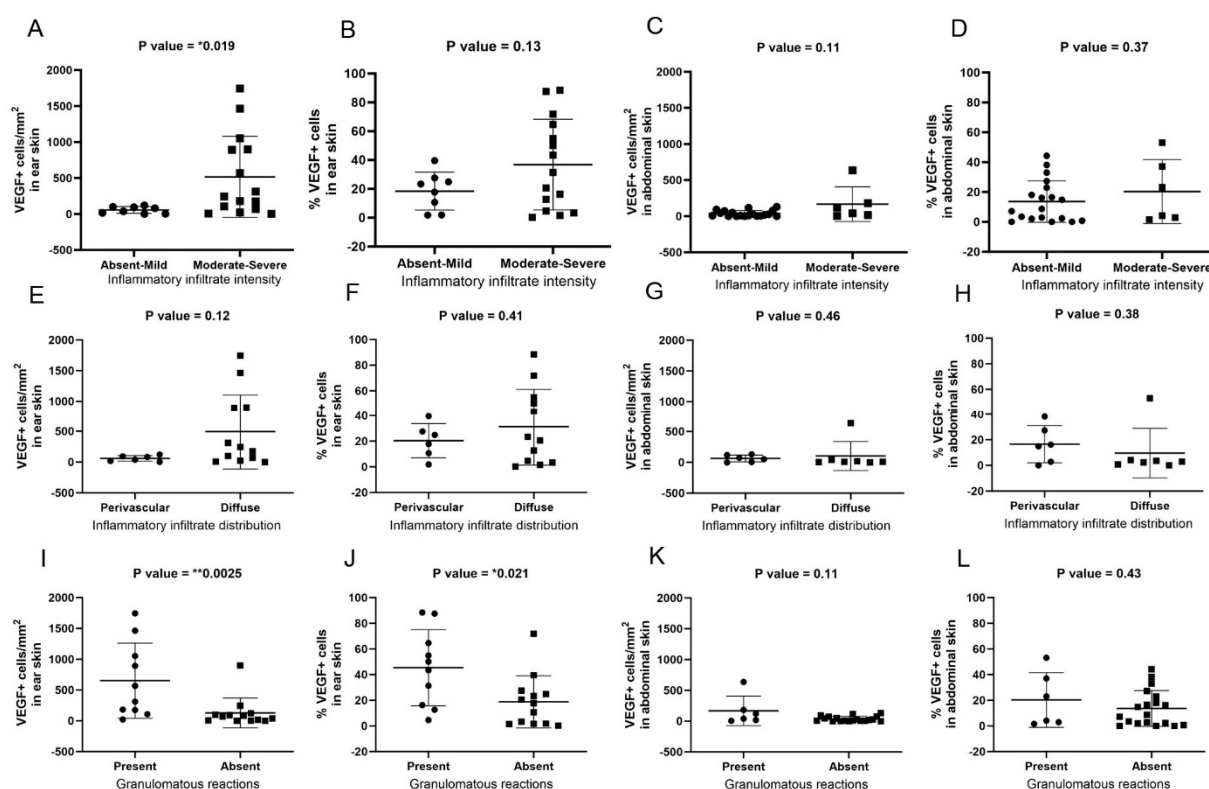

**Supplementary Figure S3.** Association between VEGF cells, intensity and distribution of inflammatory infiltrate, and the presence of granulomatous regions in ear and abdominal skin of dogs naturally infected with *L. infantum*. A: VEGF cells/mm<sup>2</sup> according to the intensity of the inflammatory infiltrate in ear skin (Mann–Whitney test. P = \* 0.019). B: Percentage of VEGF cells according to the intensity of inflammatory infiltrate in ear skin (unpaired t test. P = 0.13). C: VEGF cells/mm<sup>2</sup> according to the intensity of the inflammatory infiltrate in abdominal skin (Mann–Whitney test. P = 0.11). D: Percentage of VEGF cells according to the intensity of the inflammatory infiltrate in abdominal skin (unpaired t test. P = 0.37). E: VEGF cells/mm<sup>2</sup> according to the distribution of inflammatory infiltrate in ear skin (Mann–Whitney test. P = 0.12). F: Percentage of VEGF cells according to the distribution of inflammatory infiltrate in ear skin (unpaired t test. P = 0.41). G: VEGF cells/mm<sup>2</sup> according to the distribution of inflammatory infiltrate in abdominal skin (Mann–Whitney test. P = 0.46). H: Percentage of VEGF cells according to the distribution of inflammatory infiltrate in abdominal skin (Mann–Whitney test. P = 0.38). I: VEGF cells/mm<sup>2</sup> according to the presence of granulomatous regions in ear skin (Mann–Whitney test. P = \*\* 0.0025). J: Percentage of VEGF cells according to the presence of granulomatous regions in ear skin (Mann–Whitney test. P = \* 0.021). K: VEGF cells/mm<sup>2</sup> according to the presence of granulomatous regions in abdominal skin (Mann–Whitney test. P = 0.11). L: Percentage of VEGF cells according to the presence of granulomatous regions in abdominal skin (Mann–Whitney test. P = 0.43).

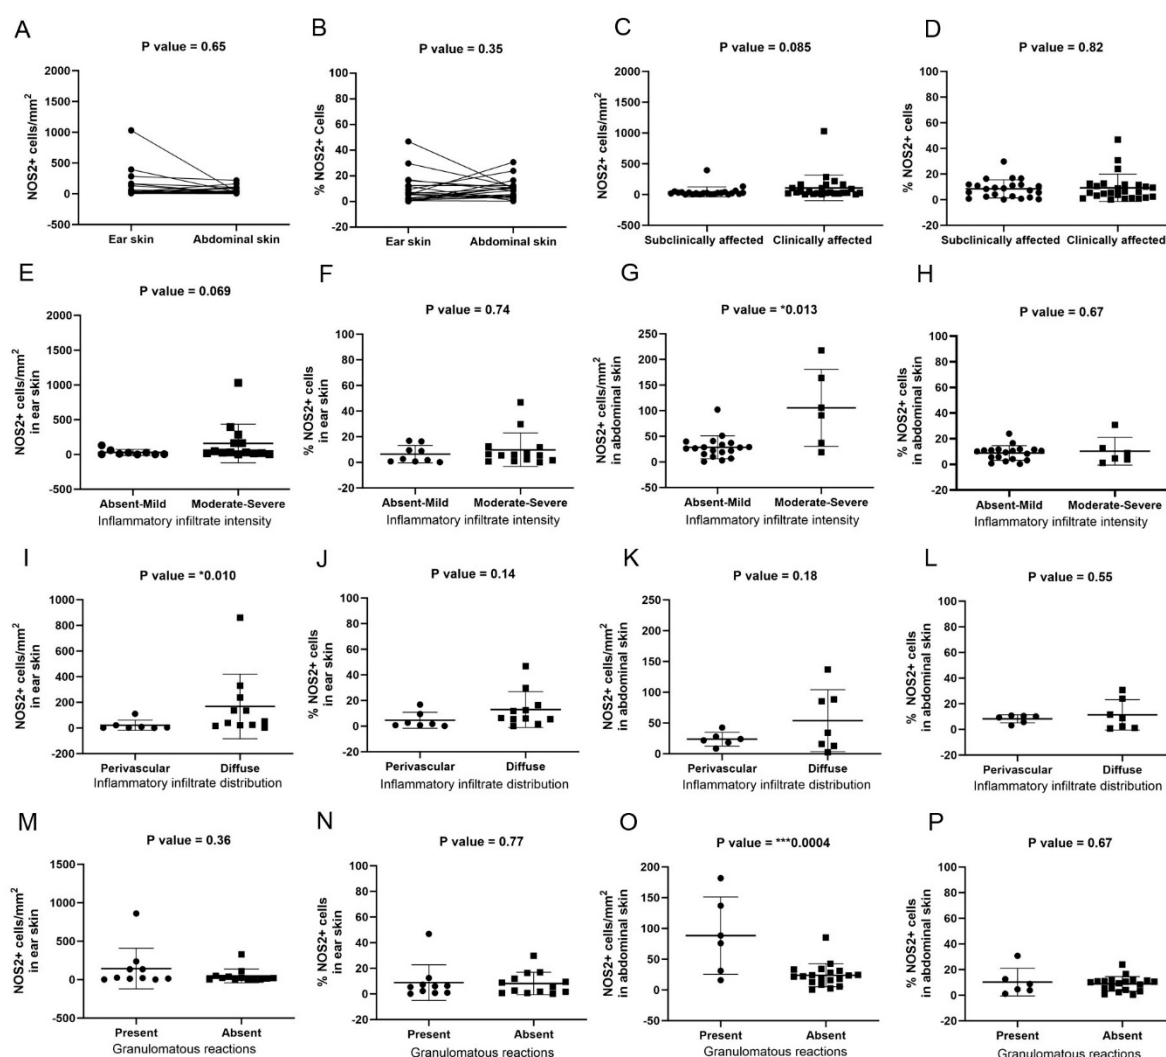

**Supplementary Figure S4. NOS2 expression and its association with inflammatory infiltrate in ear and abdominal skin of dogs naturally infected with *L. infantum*.** A: NOS2/mm<sup>2</sup> expression in paired samples of ear and abdominal skin (Wilcoxon test, P = 0.65). B: Percentage of NOS2 cells in paired samples of ear and abdominal skin (Wilcoxon test, P = 0.35). C: NOS2/mm<sup>2</sup> according to clinical status (Mann–Whitney test, P = 0.085). D: Percentage of NOS2 cells according to clinical status (Mann–Whitney test, P = 0.82). E: NOS2/mm<sup>2</sup> according to the intensity of inflammatory infiltrate in ear skin (Mann–Whitney test, P = 0.069). F: Percentage of NOS2 cells according to the intensity of inflammatory infiltrate in ear skin (Mann–Whitney test, P = 0.74). G: NOS2/mm<sup>2</sup> according to the intensity of the inflammatory infiltrate in abdominal skin (Mann–Whitney test, P = \* 0.013). H: Percentage of NOS2 cells according to the intensity of inflammatory infiltrate in abdominal skin (Mann–Whitney test, P = 0.67). I: NOS2/mm<sup>2</sup> according to the distribution of inflammatory infiltrate in ear skin (Mann–Whitney test, P = \* 0.010). J: Percentage of NOS2 cells according to the distribution of inflammatory infiltrate in ear skin (Mann–Whitney test, P = 0.14). K: NOS2/mm<sup>2</sup> according to the distribution of inflammatory infiltrate in abdominal skin (unpaired t test, P = 0.18). L: Percentage of NOS2 cells according to the distribution of inflammatory infiltrate in abdominal skin (unpaired t test, P = 0.55). M: NOS2 cells/mm<sup>2</sup> according to the presence of granulomatous regions in ear skin (Mann–Whitney test, P = 0.36). N: Percentage of NOS2 cells according to the presence of granulomatous regions in ear skin (Mann–Whitney test, P = 0.77). O: NOS2 cells/mm<sup>2</sup> according to the presence of granulomatous regions in abdominal skin (unpaired t test, P = \*\*\* 0.0004). P: Percentage of NOS2 cells according to the presence of granulomatous regions in abdominal skin (unpaired t test, P = 0.67).

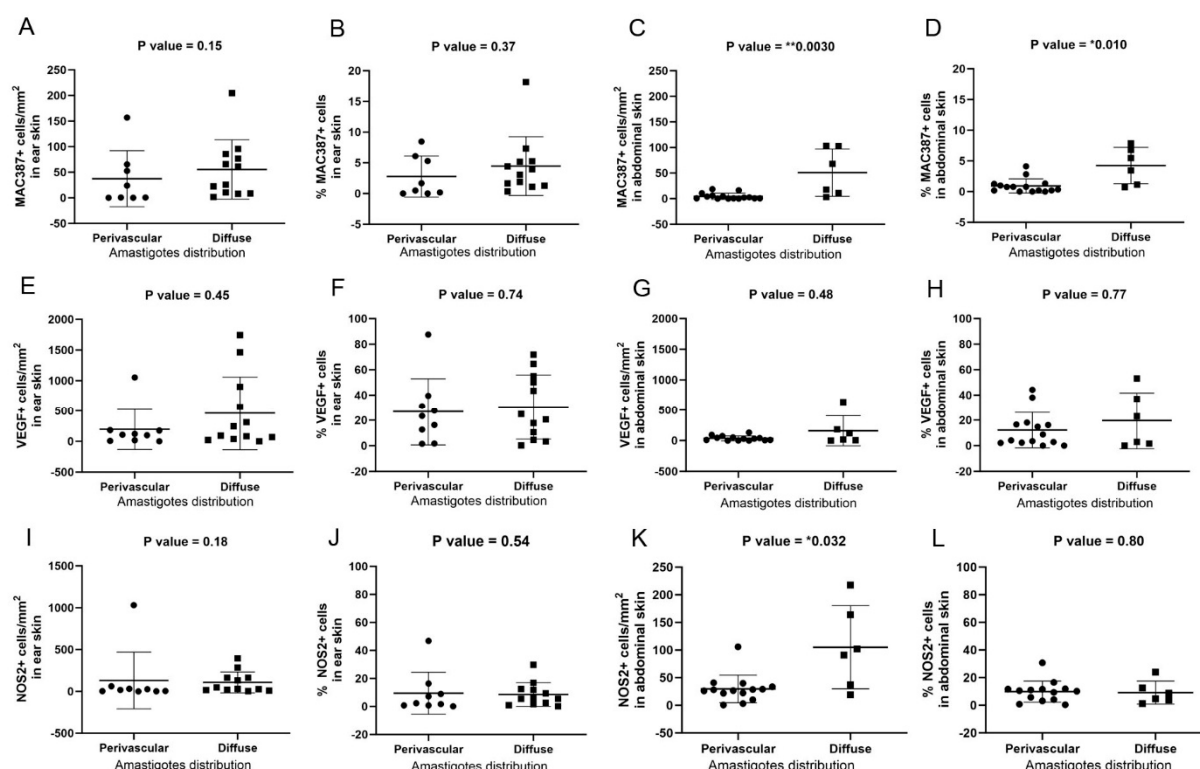

**Supplementary Figure S5.** Association between MAC 387 cells, VEGF cells and NOS2 cells and the distribution of parasite load in ear and abdominal skin of dogs naturally infected with *L. infantum*. A: MAC387 cells/mm<sup>2</sup> according to amastigote distribution in ear skin (Mann–Whitney test.  $P = 0.15$ ). B: Percentage of MAC 387 cells according to amastigote distribution in ear skin (Mann–Whitney test.  $P = 0.37$ ). C: MAC387 cells/mm<sup>2</sup> according to amastigote distribution in abdominal skin (Mann–Whitney test.  $P = ** 0.0030$ ). D: Percentage of MAC 387 cells according to amastigote distribution in abdominal skin (Mann–Whitney test.  $P = * 0.010$ ). E: VEGF cells/mm<sup>2</sup> according to amastigote distribution in ear skin (Mann–Whitney test.  $P = 0.45$ ). F: Percentage of VEGF cells according to amastigote distribution in ear skin (unpaired t test.  $P = 0.74$ ). G: VEGF cells/mm<sup>2</sup> according to amastigote distribution in abdominal skin (Mann–Whitney test.  $P = 0.48$ ). H: Percentage of VEGF cells according to amastigote distribution in abdominal skin (Mann–Whitney test.  $P = 0.77$ ). Figure I: NOS2 cells/mm<sup>2</sup> according to amastigote distribution in ear skin (Mann–Whitney test.  $P = 0.18$ ). J: Percentage of NOS2 cells according to amastigote distribution in ear skin (Mann–Whitney test.  $P = 0.54$ ). K: NOS2 cells/mm<sup>2</sup> according to amastigote distribution in abdominal skin (Mann–Whitney test.  $P = * 0.032$ ). L: Percentage of NOS2 cells according to amastigote distribution in abdominal skin (Mann–Whitney test.  $P = 0.80$ ).

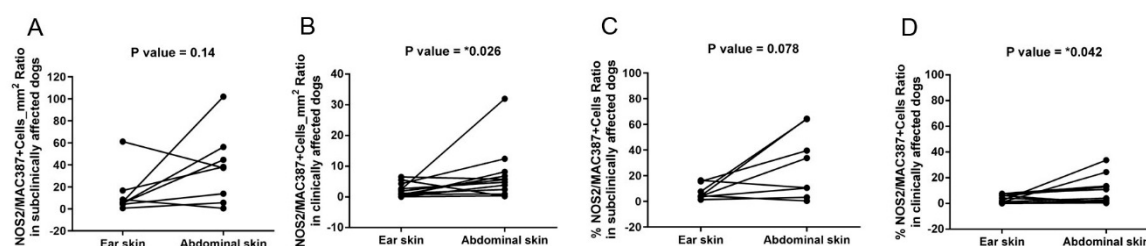

**Supplementary Figure S6.** NOS2/MAC387 ratio in paired samples of ear and abdominal skin of dogs naturally infected with *L. infantum*: A: NOS2/MAC387/mm<sup>2</sup> ratio in paired samples of ear and abdominal skin of subclinically affected dogs (Wilcoxon test.  $P = 0.14$ ). B: NOS2/MAC387/mm<sup>2</sup> ratio in paired samples of ear and abdominal skin of clinically affected dogs (Wilcoxon test.  $P = * 0.026$ ). C: % NOS2/MAC387 ratio in paired samples of ear and abdominal skin of subclinically affected dogs (Wilcoxon test.  $P = 0.078$ ). D: % NOS2/MAC387 ratio in paired samples of ear and abdominal skin of clinically affected dogs (Wilcoxon test.  $P = * 0.042$ ).

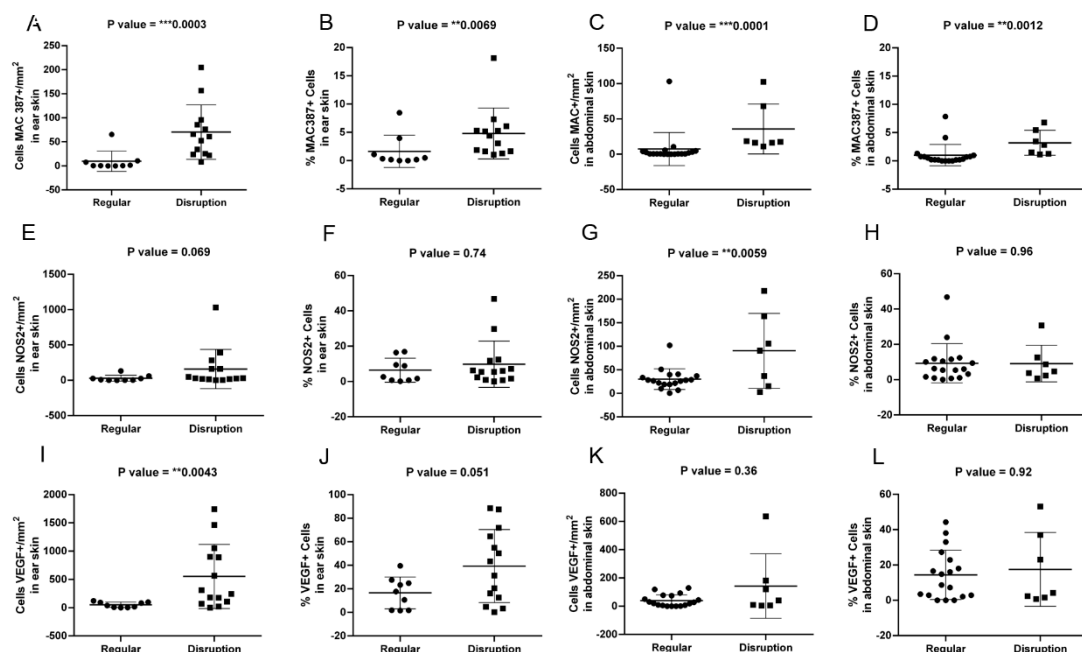

**Supplementary Figure S7. Association between collagen disruption and MAC387, NOS2 and VEGF cells in the ear and abdominal skin of dogs naturally infected with *L. infantum*.** A: MAC387 cells/mm<sup>2</sup> in ear skin (Mann–Whitney test.  $P = *** 0.0003$ ) B: Percentage of MAC387 cells in ear skin (Mann–Whitney test.  $P = ** 0.0069$ ). C: MAC387 cells/mm<sup>2</sup> in abdominal skin (Mann–Whitney test.  $P = *** 0.0001$ ). D: Percentage of MAC387 cells in abdominal skin (Mann–Whitney test.  $P = ** 0.0012$ ). E: NOS2 cells/mm<sup>2</sup> in ear skin (Mann–Whitney test.  $P = 0.069$ ). F: Percentage of NOS2 cells in ear skin (Mann–Whitney test.  $P = 0.74$ ). G: NOS2 cells/mm<sup>2</sup> in abdominal skin (unpaired t test.  $P = ** 0.0059$ ). H: Percentage of NOS2 cells in abdominal skin (Mann–Whitney test.  $P = 0.96$ ). I: VEGF cells/mm<sup>2</sup> in ear skin (Mann–Whitney test.  $P = ** 0.0043$ ). J: Percentage of VEGF cells in ear skin (unpaired t test.  $P = 0.051$ ). K: VEGF cells/mm<sup>2</sup> in abdominal skin (Mann–Whitney test.  $P = 0.36$ ). L: Percentage of VEGF cells in abdominal skin (Mann–Whitney test.  $P = 0.92$ ).

**Supplementary Table S2. Representation of the mean and minimum and maximum values of the analyzed variables according to skin fragment location and clinical status.**

|                         | Subclinically affected |                     | P Value | Clinically affected |                     | P Value | P Value Subclinical and Clinically affected |
|-------------------------|------------------------|---------------------|---------|---------------------|---------------------|---------|---------------------------------------------|
|                         | Ear skin               | Abdominal skin      |         | Ear skin            | Abdominal skin      |         |                                             |
| Number of amastigotes   | 23.07 (0-50.00)        | 13.59 (0-103.3)     | 0.097   | 64.61 (0-200.0)     | 52.05 (0-330.0)     | 0.20    | * 0.041                                     |
| Number of blood vessels | 4.129 (2.500-8.580)    | 3.866 (2.610-5.800) | 0.45    | 4.725 (2.580-7.830) | 3.789 (3.060-4.970) | * 0.026 | * 0.037                                     |

|                               |                        |                     |      |                        |                     |          |            |
|-------------------------------|------------------------|---------------------|------|------------------------|---------------------|----------|------------|
| <b>Vascular diameter (µm)</b> | 8.361<br>(4.176-15.13) | 6.696 (4.814-10.53) | 0.08 | 10.66<br>(6.141-16.77) | 6.890 (4.289-10.95) | ** 0.008 | *** 0.0009 |
|-------------------------------|------------------------|---------------------|------|------------------------|---------------------|----------|------------|

**Supplementary Table S3. Representation of the mean and minimum and maximum values of the analyzed variables according to skin fragment location.**

|                                     | <b>Ear skin of Subclinically and Clinically affected dogs</b> | <b>Abdominal skin of Subclinically and Clinically affected dogs</b> | <b>P value</b> |
|-------------------------------------|---------------------------------------------------------------|---------------------------------------------------------------------|----------------|
| <b>Cells MAC 387/mm<sup>2</sup></b> | 45.48 (0-204.7)                                               | 17.59 (0-103.2)                                                     | ** 0.0066      |
| <b>% MAC 387 Cells</b>              | 3.501 (0-18.15)                                               | 1.827 (0-7.840)                                                     | * 0.017        |
| <b>Cells VEGF/mm<sup>2</sup></b>    | 372.5 (1.000-1745)                                            | 70.57 (0-636.1)                                                     | **** < 0.0001  |
| <b>% VEGF cells</b>                 | 31.68 (0.2500-88.46)                                          | 15.14 (0-53.11)                                                     | ** 0.0093      |
| <b>Cells NOS2/mm<sup>2</sup></b>    | 111.9 (0.5000-1030)                                           | 50.44 (0.5000-217.5)                                                | 0.65           |
| <b>% NOS2 cells</b>                 | 8.449 (0.1000-46.84)                                          | 9.715 (0.3600-30.75)                                                | 0.37           |
